# Supplementary material for: Human Angiostrongyliasis Outbreak in Dali, China
Source: PLoS Negl Trop Dis. 2009 Sep 22;3(9):e520. doi: 10.1371/journal.pntd.0000520 (PMC2739427; doi:10.1371/journal.pntd.0000520)
Supplement: Table S1 — The diagnoses and clinical evidence of 33 patients. (0.04 MB XLS) [file pntd.0000520.s001.xls]

## Sheet: Sheet1
No.	Sex	Age (year)	Eating history	Chief complaint	Eosinophil in blood ¶			CSF assay ¶						Serologic assay	Parasite	Diagnosis
					Absolute value (cells/μL)	Percentage		Total WBC (cells/μL)	Eo (cells/μL)	Eo (%)	Protein (mg/L)	Glucose (mmol/L)	Chlorinate (mmol/L)
			①	②	③				④					⑤	⑥
1	F	38	Snail	Headache	1000	12.2		34	13.056	38.4	937	2.68	126	-	N	Clinically diagnosed
2	F	41	Snail	Headache	950	13		720	273.6	38	820	1.65	110	Schistosoma japonicum (-), Trichinella spiralis (-), Echinococcus (-), Cysticercus (-)	N	Clinically diagnosed
3	M	45	Snail	Headache	940	11		480	183.36	38.2	1106	2.04	126	-	N	Clinically diagnosed
4	M	20	Snail	Headache	2170	26.6		87	30.537	35.1	468	2.48	125	-	N	Clinically diagnosed
5	F	40	Snail	Headache	690	5.8		298	122.18	41	198	2.92	116	Schistosoma japonicum (-), Trichinella spiralis (-), Echinococcus (-), Cysticercus (-)	N	Clinically diagnosed
6	M	36	Snail	Headache	1120	15.8		380	15.2	4	514	2.41	117.3	Schistosoma japonicum (-), Trichinella spiralis (+), Echinococcus (-), Cysticercus (-)	N	Clinically diagnosed
7	M	33	Raw fish	Headache	560	9.3		270	138.78	51.4	900	3.29	128	-	N	Clinically diagnosed
8	M	50	Snail	Numbness and weakness in left limbs and trunk	1480	14.3		92	58	64	612	3.41	115	Schistosoma japonicum (-), Trichinella spiralis (-), Echinococcus (-), Cysticercus (-)	N	Clinically diagnosed
9	M	38	Snail	Headache	1330	21.4		142	52.54	37	520	5.08	107.6	Schistosoma japonicum (-), Trichinella spiralis (-), Echinococcus (-), Cysticercus (-)	N	Clinically diagnosed
10	M	35	-	Headache	990	16.1		125	57.5	46.5	1120	2.69	124	-	N	Clinically diagnosed
11	F	39	Snail	Headache	730	12.9		345	193.2	56	326	2.62	109.2	Schistosoma japonicum (-), Trichinella spiralis (-), Echinococcus (-), Cysticercus (-)	N	Clinically diagnosed
12	F	35	Snail	Headache; muscle weakness	1400	13.4		24	0	0	189	3.59	117	Schistosoma japonicum (-), Trichinella spiralis (-), Echinococcus (-), Cysticercus (-)	N	Suspected
13	F	35	Snail	Headache	1930	24.7		11	0	0	421	1.82	116	Schistosoma japonicum (-), Trichinella spiralis (-), Echinococcus (-), Cysticercus (-)	N	Suspected
14	M	34	Snail	Headache	1160	13.2		10	3.85	38.5	880	2.33	127	-	N	Suspected
15	M	32	Raw fish	Headache	730	7.5		4	1.472	36.8	641	3.33	125	-	N	Suspected
16	M	32	other	Headache	1130	12.3		10	4.41	44.1	918	3.98	126	-	N	Suspected
17	F	17	Snail	Headache	40	*		300	30	10	342	2.19	145	Anigostrongylus cantonensis (+)	N	Suspected
18	F	72	Snail	Headache; pain in right upper limb	260	*		-	-	-	-	-	-	Anigostrongylus cantonensis (+)	N	Suspected
19	M	35	Raw fish	Headache	900	13.8		*	*	23.8	918	2.39	125	Cysticercus(-)	N	Suspected
20	F	33	Snail	Headache	260	1.9		180	95.4	53	1360	3.4	130	Trichinella spiralis (+)	N	Suspected
21	F	44	Snail	Headache	70	0.9		165	0	0	3857	1.38	110.2	Schistosoma japonicum (-), Trichinella spiralis (-), Echinococcus(-), Cysticercus(-)	N	Suspected
22	F	22	Snail	Headache	30	0.2		73	24.382	33.4	773	2.46	125	-	N	Suspected
23	F	42	Raw fish	Headache	630	5.1		60	5.82	9.7	759	2.66	123	Cysticercus (-)	N	Suspected
24	F	40	Snail	Headache	100	*		200	64	32	667	2	151	Angiostrongylus cantonensis (－), Cysticercus (-)	N	Suspected
25	M	31	Raw fish	Headache	630	9.7		*	*	0	751	3.41	123	-	N	Suspected
26	F	12	other	Headache	0	0		190	95	50	1180	1.96	105	Cysticercus (-)	N	Suspected
27	F	16	other	Headache	430	4.3		450	72	16	258	2.56	113	Schistosoma japonicum (-), Trichinella spiralis (-), Echinococcus (-), Cysticercus (-)	N	Suspected
28	M	22	Snail	Headache	130	1		*	*	45.9	986	2.41	126	-	N	Suspected
29	M	40	Raw fish	Headache	50	0.7		27	0	0	616	3.82	126	-	N	Suspected
30	F	48	other	Headache	430	6.7		195	92.235	47.3	743	3.12	127	-	N	Suspected
31	M	21	Snail	Headache	500	4.03		-	-	-	-	-	-	Angiostrongylus cantonensis (+)	N	Suspected
32	F	21	Snail	Headache	1240	14.6		-	-	-	-	-	-	Angiostrongylus cantonensis (+)	N	Suspected
33	F	32	Snail	Headache	2070	24.7		35	0	0	387	2.13	115	Schistosoma japonicum (-), Trichinella spiralis (-), Echinococcus (-), Cysticercus (-)	N	Suspected
¶ first test results
* data were not obtained
– assay was not performed
①～⑤ criteria in main text
